# Supplementary material
Source: HighWire-hosted journal article supplement (http://www.jrheum.org/highwire/filestream/33241/field_highwire_adjunct_files/0/170710_Data_Suppl.pdf)
Supplement: 170710_Data_Suppl.pdf [file 170710_Data_Suppl.pdf]

ONLINE SUPPLEMENTARY DATA

**Supplementary Data 1.** Literature Search Strategy.

Initial search undertaken 6<sup>th</sup> October 2016, repeated 12<sup>th</sup> October 2017

Databases:

1. EMBASE 1974 – 2017 Week 41
2. Ovid MEDLINE<sup>®</sup> Epub Ahead of Print, In-Process & Other Non-Indexed Citations, Ovid MEDLINE<sup>®</sup> Daily and Ovid MEDLINE<sup>®</sup> 1946 – Present

**Literature Search Strategy**

1. inflammatory arthritis.mp. [mp=ti, ab, hw, tn, ot, dm, mf, dv, kw, fx, nm, kf, px, rx, an, ui, sy]
2. rheumatoid arthritis.mp. [mp=ti, ab, hw, tn, ot, dm, mf, dv, kw, fx, nm, kf, px, rx, an, ui, sy]
3. immunisation.mp. [mp=ti, ab, hw, tn, ot, dm, mf, dv, kw, fx, nm, kf, px, rx, an, ui, sy]
4. vaccination.mp. [mp=ti, ab, hw, tn, ot, dm, mf, dv, kw, fx, nm, kf, px, rx, an, ui, sy]
5. vaccine.mp. [mp=ti, ab, hw, tn, ot, dm, mf, dv, kw, fx, nm, kf, px, rx, an, ui, sy]
6. influenza.mp. [mp=ti, ab, hw, tn, ot, dm, mf, dv, kw, fx, nm, kf, px, rx, an, ui, sy]
7. influenza vaccine.mp. [mp=ti, ab, hw, tn, ot, dm, mf, dv, kw, fx, nm, kf, px, rx, an, ui, sy]
8. pneumovax.mp. [mp=ti, ab, hw, tn, ot, dm, mf, dv, kw, fx, nm, kf, px, rx, an, ui, sy]
9. pneumococcal vaccine.mp. [mp=ti, ab, hw, tn, ot, dm, mf, dv, kw, fx, nm, kf, px, rx, an, ui, sy]
10. prevenar.mp. [mp=ti, ab, hw, tn, ot, dm, mf, dv, kw, fx, nm, kf, px, rx, an, ui, sy]
11. 1 or 2
12. 3 or 4 or 5 or 6 or 7 or 8 or 9 or 10
13. 11 and 12
14. remove duplicates from 13
15. limit 14 to english language
16. limit 15 to human

17. limit 16 to yr=2000-Current

## COHORT STUDIES

### **Selection (4 points in total)**

#### Representativeness of the exposed cohort (1 point)

Yes if:

- rheumatoid arthritis (RA) diagnosis confirmed by American College of Rheumatology (ACR) 1987/2010 criteria.
- details on selection process of the RA cohort, e.g. randomly selected from a hospital clinic, or invited via postal-invitation to participate in the study

No if:

- RA patients do not fulfil ACR RA diagnostic criteria
- details on the method of recruitment of RA patients not presented

#### Selection of the non-exposed cohort (1 point)

Yes if:

- RA patients serving as healthy cohorts were stated to not have any immunosuppressive exposure prior to vaccination
- the healthy control cohort were randomly selected from the local population

No if:

- the control cohort were drawn from hospital workers only
- the control drawn from a different source and not from the same community
- there was no description of the derivation of the non-exposed cohort

#### Ascertainment of exposure (1 point)

Yes if:

- it was documented that no recent vaccination against influenza (within the same vaccination season) and/or pneumococcal vaccine (within 5 years) had been performed
- details were from a secure record (e.g. medical records)

No if:

Online supplement to: A Systematic Review and Metaanalysis of Antirheumatic Drugs and Vaccine Immunogenicity in Rheumatoid Arthritis. *The Journal of Rheumatology*. doi:10.3899/jrheum.170710

- there was no description of pre-vaccination antibody titres or no evidence of exclusion criteria including previous vaccination history

Demonstration that outcome of interest was not present at start of study (1 point)

Yes if:

- pre-vaccine titres were checked pre-immunisation and details provided on to calculate number/proportion of patients who achieved seroprotection, seroconversion or seroresponse

No if

- there was no history of vaccination within 12 months for influenza vaccination or 5 years for pneumococcal vaccination

**Comparability (2 points)**

Yes if:

- RA and control cohorts were age matched
- RA and control cohorts were age and sex matched
- The RA population serving as a control cohort, matched for disease duration

No if:

- Cohorts not age matched

**Outcome (3 points)**

Assessment of outcome (1 point)

Yes if:

- The percentages of achieving seroprotection or seroconversion calculable from data presented
- Blinded analysis of post-vaccination titres

No if:

- No data presented for post vaccination titres

Was follow-up long enough for outcomes to occur (1 point)

Yes if:

- 3-6 week follow up period for post-vaccination titres to assess seroprotection or seroconversion

No if:

- Follow up period outside set time frame

Adequacy of follow up of cohorts (1 point)

Yes if:

- Complete follow up - all subjects accounted for or >80% subject follow up rate

No if:

- Follow up rates unable to be calculated or data not presented

Interpretation of Newcastle Ottawa Scale:

0 – 3 = poor quality study

4 – 6 = satisfactory quality study

7 – 9 = high quality study

Supplementary Table 1: Quality assessment of studies using the Newcastle Ottawa Scale.

| Study                 | Selection                                |                                     |                           | Comparability                                                            |                          | Outcome               |                                                  |                                  | Total NOS score | Comment                                                                                                                                                                |
|-----------------------|------------------------------------------|-------------------------------------|---------------------------|--------------------------------------------------------------------------|--------------------------|-----------------------|--------------------------------------------------|----------------------------------|-----------------|------------------------------------------------------------------------------------------------------------------------------------------------------------------------|
|                       | Representativeness of the exposed cohort | Selection of the non-exposed cohort | Ascertainment of exposure | Demonstration that outcome of interest was not present at start of study | Comparability of cohorts | Assessment of outcome | Was follow-up long enough for outcomes to occur? | Adequacy of follow up of cohorts |                 |                                                                                                                                                                        |
| Franca 2012 (16)      | 1                                        | 1                                   | 1                         | 1                                                                        | 0                        | 1                     | 1                                                | 1                                | 7               | RA and control cohorts not aged matched. Control population from hospital population.                                                                                  |
| Iwamoto 2012 (15)     | 1                                        | 0                                   | 0                         | 0                                                                        | 0                        | 1                     | 1                                                | 1                                | 5               | Method of recruitment of RA or control cohorts not discussed. Demographic data for comparability of cohorts not presented. Previous vaccination status not documented. |
| Kapetanovic 2006 (25) | 1                                        | 0                                   | 1                         | 0                                                                        | 0                        | 1                     | 1                                                | 1                                | 5               | RA and control cohorts were not aged matched. Controls were selected from healthy hospital controls. Previous vaccination status not documented.                       |
| Kapetanovic 2007 (11) | 1                                        | 0                                   | 1                         | 0                                                                        | 1                        | 1                     | 1                                                | 1                                | 6               | RA and control cohorts not aged matched. Controls were selected from healthy hospital controls. Previous                                                               |

|                       |   |   |   |   |   |   |   |   |   |                                                      |
|-----------------------|---|---|---|---|---|---|---|---|---|------------------------------------------------------|
|                       |   |   |   |   |   |   |   |   |   | vaccination status not documented.                   |
| Kapetanovic 2011 (26) | 1 | 0 | 1 | 1 | 0 | 1 | 1 | 1 | 6 | RA and control cohorts not aged matched.             |
| Kobie 2011 (12)       | 1 | 0 | 1 | 1 | 0 | 1 | 1 | 1 | 6 | RA and control cohorts not aged matched.             |
| Kubota 2007 (14)      | 1 | 0 | 0 | 1 | 1 | 1 | 1 | 1 | 6 | No information of how control cohort were recruited. |
| Ribeiro 2011 (17)     | 1 | 1 | 1 | 1 | 0 | 1 | 1 | 1 | 7 | RA and control cohorts not aged matched.             |
| Salemi 2009 (13)      | 1 | 0 | 0 | 1 | 0 | 1 | 1 | 1 | 5 | No data presented comparing ages of two cohorts.     |

**Supplementary Table 2.** Studies examining pneumococcal vaccine responses with different anti-rheumatic drug exposures.

| Author, Year [Reference]     | Subjects (n)                                                             | Vaccine | Outcome                                                                                                                                                   | Mean Age, years (SD)                                                        | Female n (%)                                         | Disease duration, years (SD)           | DAS28 score (SD)                                                                                                     | HAQ score (SD) | Vaccine response                                                                                                                                                                                                                           | Comments                                                                                           |
|------------------------------|--------------------------------------------------------------------------|---------|-----------------------------------------------------------------------------------------------------------------------------------------------------------|-----------------------------------------------------------------------------|------------------------------------------------------|----------------------------------------|----------------------------------------------------------------------------------------------------------------------|----------------|--------------------------------------------------------------------------------------------------------------------------------------------------------------------------------------------------------------------------------------------|----------------------------------------------------------------------------------------------------|
| Kapetanovic et al. 2006 (25) | RA (149, 62 TNFi monotherapy, 50 TNFi + MTX, 37 MTX monotherapy) HC (47) | PPV23   | ≥ 2-fold or higher increase in 6b and 23f serotype Ab concentration, 4 to 6-weeks post vaccination                                                        | Median age: TNFi monotherapy 53.7 TNF+MTX 52.8 MTX monotherapy 61.3 HC 30.3 | TNFi (76) TNFi + MTX (70) MTX (68) HC (74)           | TNFi 20.8 TNFi + MTX 10.8 MTX 7.0 HC - | % of patients with Low/Intermediate/High DAS28 at time of vaccination: TNFi: 49/41/10 TNF+MTX: 50/44/6 MTX: 53/35/12 | -              | % of patients with adequate vaccine response: TNFi 50%, TNFi + MTX 32%, MTX 13.5%, HC 38.2%                                                                                                                                                | MTX associated with a reduced response to PPV23 vaccination, no effect of TNFi on vaccine response |
| Visvanathan et al. 2007 (44) | RA (70, 20 IFX 3mg/kg + MTX, 36 IFX 6mg/kg + MTX, 14 Placebo + MTX)      | PPV23   | ≥ 2-fold increase at least 6 vaccine serotypes compared to pre-vaccine levels                                                                             | Median age: IFX 3mg/kg: 52 IFX 6mg/kg 50 Placebo 50                         | IFX 3mg/kg: (65) IFX 6mg/kg: (66.7) Placebo (78.6)   | -                                      | -                                                                                                                    | -              | >80% of patients in each group responded to 1≥ serotypes, 20-25% responded to 6≥ different serotypes                                                                                                                                       | No impact of MTX exposure on vaccine responses                                                     |
| Kaine et al. 2007 (42)       | RA (218, 109 Placebo ± MTX, 109 ADA ± MTX)                               | PPV23   | ≥ 2-fold titre increase in ≥ 3 of 5 vaccine serotypes and protective Ab titres ≥1.6 mcg/ml, 4-weeks post vaccination. Serotypes 9V, 14, 18C, 19F, and 23F | 51.7 ± 11.66                                                                | Placebo 82 (75.2), ADA 84 (84.8), Overall 166 (79.8) | -                                      | -                                                                                                                    | -              | % of patients achieving a ≥ 2-fold increase in ≥ 3 of 5 pneumococcal Ab titres: ADA 37.4%, Placebo 40.4%. % of patients achieving protective Ab titres >1.6mcg/ml in ≥ 3 of 5 antigens) 4 weeks post vaccination: ADA 85.9%, Placebo 81.7% | No impact of TNFi exposure on vaccine responses                                                    |

|                              |                                                    |       |                                                                                                                     |                                                                             |                                                                              |                                                                             |                                                                             |                                                                             |                                                                                                                                                                                                                                                                      |                                                                                                |
|------------------------------|----------------------------------------------------|-------|---------------------------------------------------------------------------------------------------------------------|-----------------------------------------------------------------------------|------------------------------------------------------------------------------|-----------------------------------------------------------------------------|-----------------------------------------------------------------------------|-----------------------------------------------------------------------------|----------------------------------------------------------------------------------------------------------------------------------------------------------------------------------------------------------------------------------------------------------------------|------------------------------------------------------------------------------------------------|
| Bingham et al. 2010 (27)     | RA (93, RTX+MTX 65, MTX 28)                        | PPV23 | ≥2-fold increase or an increase of 1 mcg/ml from pre-vaccination level. 12 pneumococcal serotype responses assessed | RTX + MTX 49.7 (9.6)<br>MTX 49.7 (10.5)                                     | RTX + MTX 51 (75), MTX 25 (78)                                               | -                                                                           | RTX +MTX 6.2 (1.1)<br>MTX -                                                 | -                                                                           | Decreased responses to PPV23<br>RTX+MTX 57% of subjects had a 2-fold rise in Ab titre response to >1 serotype, compared with 82% of MTX monotherapy patients. Lower proportions of patients responding to each serotype in RTX+MTX group compared to MTX monotherapy | Reduced vaccine response in RTX exposed patients compared to MTX                               |
| Kapetanovic et al. 2011 (32) | RA (253, MTX 85, TNF+MTX 89, TNF 79) SpA/HC (85)   | PCV-7 | ARR ≥ 2, 4 to 6-weeks post-vaccination, serotypes 6b and 23f                                                        | MTX 61.5 (14)<br>TNFi + MTX 60.1 (10)<br>TNFi 59.8 (14)<br>SpA/HC 51.6 (12) | MTX: 67 (78.8)<br>TNFi + MTX 69 (77.5)<br>TNFi 69 (87.3)<br>SpA/HC 39 (45.3) | MTX 11.4 (10)<br>TNFi + MTX 16.2 (12)<br>TNFi 20.6 (11)<br>SpA/HC 12.7 (12) | MTX 3.7 (1.2)<br>TNFi + MTX 3.4 (1.2)<br>TNFi 3.9 (1.1)<br>SpA/HC 3.0 (1.1) | MTX 0.7 (0.6)<br>TNFi + MTX 0.9 (0.7)<br>TNFi 1.2 (0.7)<br>SpA/HC 0.5 (0.5) | Number (%) of subjects achieving ≥ 2-fold increase in pre-vaccination Ab levels<br>MTX 18 (21.2), TNFi + MTX 14 (15.7), TNFi 29 (36.7), SpA/HC 41 (47.7)                                                                                                             | MTX associated with a reduced response to PCV-7, no effect of TNFi therapy on vaccine response |
| Mori et al. 2012 (29)        | RA (190, MTX 62, TOC + MTX 54, TOC 50, Control 24) | PPV23 | ≥2-fold in IgG concentrations or ≥10-fold or more increase in opsonisation indices                                  | MTX 68.3, TOC + MTX 65.1, TOC 68.3, Control 69.2                            | MTX 51 (82.3), TOC + MTX 50 (92.6), TOC 43 (86), Control 19 (79.2)           | MTX 10.0, TOC + MTX 9.1, TOC 12.5, Control 11.3                             | -                                                                           | -                                                                           | Fold increases 6b/23f (SD)<br>MTX 1.5 (1.1-3.0)/ 2.6 (1.4-4.1)<br>TOC + MTX 1.6 (1.2-1.9)/ 2.9 (1.0-6.9), TOC 2.8 (1.4-4.4)/ 3.4 (1.5-6.8), Control 1.8 (1.3-3.7)/ 3.5 (1.7-5.6)                                                                                     | Post-vaccination Ab responses may be reduced when TOC combined with MTX.                       |



|                          |                                                |       |                                                                                                                                                                       |                                                          |                                                |                                                          |                                                          |           |                                                                                                                                                                             |                                                                                                            |
|--------------------------|------------------------------------------------|-------|-----------------------------------------------------------------------------------------------------------------------------------------------------------------------|----------------------------------------------------------|------------------------------------------------|----------------------------------------------------------|----------------------------------------------------------|-----------|-----------------------------------------------------------------------------------------------------------------------------------------------------------------------------|------------------------------------------------------------------------------------------------------------|
| Kivitz et al. 2014 (43)  | RA (207, Placebo +/- MTX 110, CZP +/- MTX 107) | PPV23 | ≥ 2-fold increase in ≥ 3 of 6 pneumococcal antigens at 6 weeks, serotypes: 6b, 9v, 14, 18c, 19f, 23f                                                                  | Placebo 52.7 (11.1), CZP 53.1 (11.8)                     | Placebo (76.3), CZP (83.6)                     | Placebo 7.9 (8.4), CZP 7.4 (8.1)                         | Placebo 5.5 (0.9), CZP 5.5 (1.0)                         | -         | Adequate response in patients with/without protective titres at baseline: Placebo 58.2%/62.5%, CZP 53.3%/54.5%                                                              | No significant effect of TNFi exposure on vaccine response.                                                |
| Tsuru et al. 2014 (23)   | RA (21, TOC)                                   | PPV23 | ≥2-fold increase in Ab titres in at least 6 of 12 measured serotypes                                                                                                  | 54                                                       | 17 (81)                                        | 9.0                                                      | -                                                        | -         | 100% patients achieved adequate sero-response                                                                                                                               | No comparator group in study.                                                                              |
| Bingham et al, 2015 (30) | RA (74, TOC + MTX 50, MTX 24)                  | PPV23 | ≥2-fold increase or an increase of 1 mcg/ml from pre-vaccination level, to ≥6/12 serotypes                                                                            | TOC + MTX 51.1 (8.9), MTX 51.4 (9.5)                     | TOC+MTX 41 (75.9), MTX 22 (81.5)               | TOC+MTX 13.2 (11.5), MTX 8.4 (7.0)                       | -                                                        | -         | Proportions of responders to ≥6 of 12 anti-pneumococcal antibody serotypes: TOC + MTX 60%, MTX 70.8%                                                                        | No significant effect of TOC exposure on vaccine response, however individual serotype responses may vary. |
| Migita et al. 2015 (28)  | RA (111, RA control 35, MTX 55, ABA 21)        | PPV23 | ≥2-fold increase in IgG concentrations of 6b or 23f serotypes                                                                                                         | RA control 70.5 (10.8), MTX 63.8 (11.5), ABA 59.8 (12.0) | RA control 23 (65.7), MTX 44 (80), ABA 17 (81) | RA control 11.7 (12.5), MTX 14.1 (10.9), ABA 13.5 (11.2) | RA control 2.79 (1.17), MTX 2.61 (0.98), ABA 2.48 (1.31) | -         | Fold increase in GMT 6b (95%CI)/23f (95% CI) RA control 2.38 (1.41 - 5.62)/3.36(1.85 to 9.42), MTX 1.75(1.15-3.11)/2.00(1.27 to 5.48), ABA 1.41(0.87-3.09)/2.45 (1.23-7.44) | Reduced responses in ABA and MTX exposed patients compared to RA control group.                            |
| Alten et al. 2016 (21)   | RA (125, 115 ABA + MTX, 10 ABA)                | PPV23 | ≥2-fold increase in post-vaccination titers to ≥3 of 5 antigens and protective Ab levels of ≥1.6 mcg/mL to ≥3 of 5 antigens. Serotypes measured 9V, 14, 18C, 19F, 23F | 45.7 (13.8)                                              | 107 (85.6)                                     | -                                                        | 5.0 (1.9)                                                | 1.4 (0.8) | 83.9 % demonstrated protective Ab levels following PPV23 vaccination.                                                                                                       | No comparator group in study.                                                                              |

|                           |                                                    |       |                                                                                                                                                          |                                                           |                                                                      |   |                                                                             |   |                                                                                                                                                                                                                                                                                                                                                                                                                 |                                                                                                                                                                                                                     |
|---------------------------|----------------------------------------------------|-------|----------------------------------------------------------------------------------------------------------------------------------------------------------|-----------------------------------------------------------|----------------------------------------------------------------------|---|-----------------------------------------------------------------------------|---|-----------------------------------------------------------------------------------------------------------------------------------------------------------------------------------------------------------------------------------------------------------------------------------------------------------------------------------------------------------------------------------------------------------------|---------------------------------------------------------------------------------------------------------------------------------------------------------------------------------------------------------------------|
| Winthrop et al. 2016 (24) | RA (200, TOF + MTX 57, TOF 45, MTX 55, placebo 43) | PPV23 | 2-fold increase in post-vaccination titers to $\geq 6$ of 12 antigens, 5-weeks post-vaccination. Serotypes measured 1,3,4,5,6B,7F,14,19A, 19F, 23F, 18C) | RA (TOF exposed) 53<br>RA (placebo or MTX monotherapy) 53 | RA (TOF exposed) 75 (73.5) RA (placebo or MTX monotherapy) 79 (80.6) | - | RA (TOF exposed) 6.03 (1.05)<br>RA (placebo or MTX monotherapy) 5.78 (1.10) | - | TOF overall 46/102 (45.1%) demonstrated appropriate vaccine response. In TOF non-exposed patients, response rate was higher 67/98 (68.4%). Achievement of appropriate PPV23 vaccine response stratified by MTX use at baseline: TOF + MTX 18/57 (31.6%), TOF monotherapy 28/45 (62.2%). MTX monotherapy 34/55 (61.8%) demonstrated appropriate vaccine response compared to 33/43 (76.7%) in the placebo group. | TOF exposure, particularly in combination with MTX is associated with reduced humoral response to PPV23 vaccination. Temporary withdrawal of TOF has no benefit on vaccine response compared to continuous therapy. |
|---------------------------|----------------------------------------------------|-------|----------------------------------------------------------------------------------------------------------------------------------------------------------|-----------------------------------------------------------|----------------------------------------------------------------------|---|-----------------------------------------------------------------------------|---|-----------------------------------------------------------------------------------------------------------------------------------------------------------------------------------------------------------------------------------------------------------------------------------------------------------------------------------------------------------------------------------------------------------------|---------------------------------------------------------------------------------------------------------------------------------------------------------------------------------------------------------------------|

Legend: n: number, SD: standard deviation, DAS28: Disease Activity Score of 28 joints, HAQ: Health Assessment Questionnaire, RA: rheumatoid arthritis, HC: Healthy Controls, SpA: Spondyloarthritis, MTX: methotrexate, TNFi: Tumour Necrosis Factor inhibitor drug, PPV23: pneumovax vaccine, PCV-7: 7 conjugate pneumococcal vaccine, PCV-13: 13 conjugate pneumococcal vaccine, Ab: antibody, ARR: antibody response ratio (i.e., ratio of post to pre-vaccination antibody levels), DMARD: Disease Modifying Anti-Rheumatic Drug, RTX: Rituximab, ABA: Abatacept, TOC: Tocilizumab, IFX: infliximab, CZP: Certolizumab pegol, ADA: Adalimumab, ETA: Etanercept, TOF: Tofacitinib
